# Supplementary material
Source: PubMed Central journal article supplement (PMC4362243)
Supplement: JCI75821sd.pdf [file JCI75821sd.pdf]

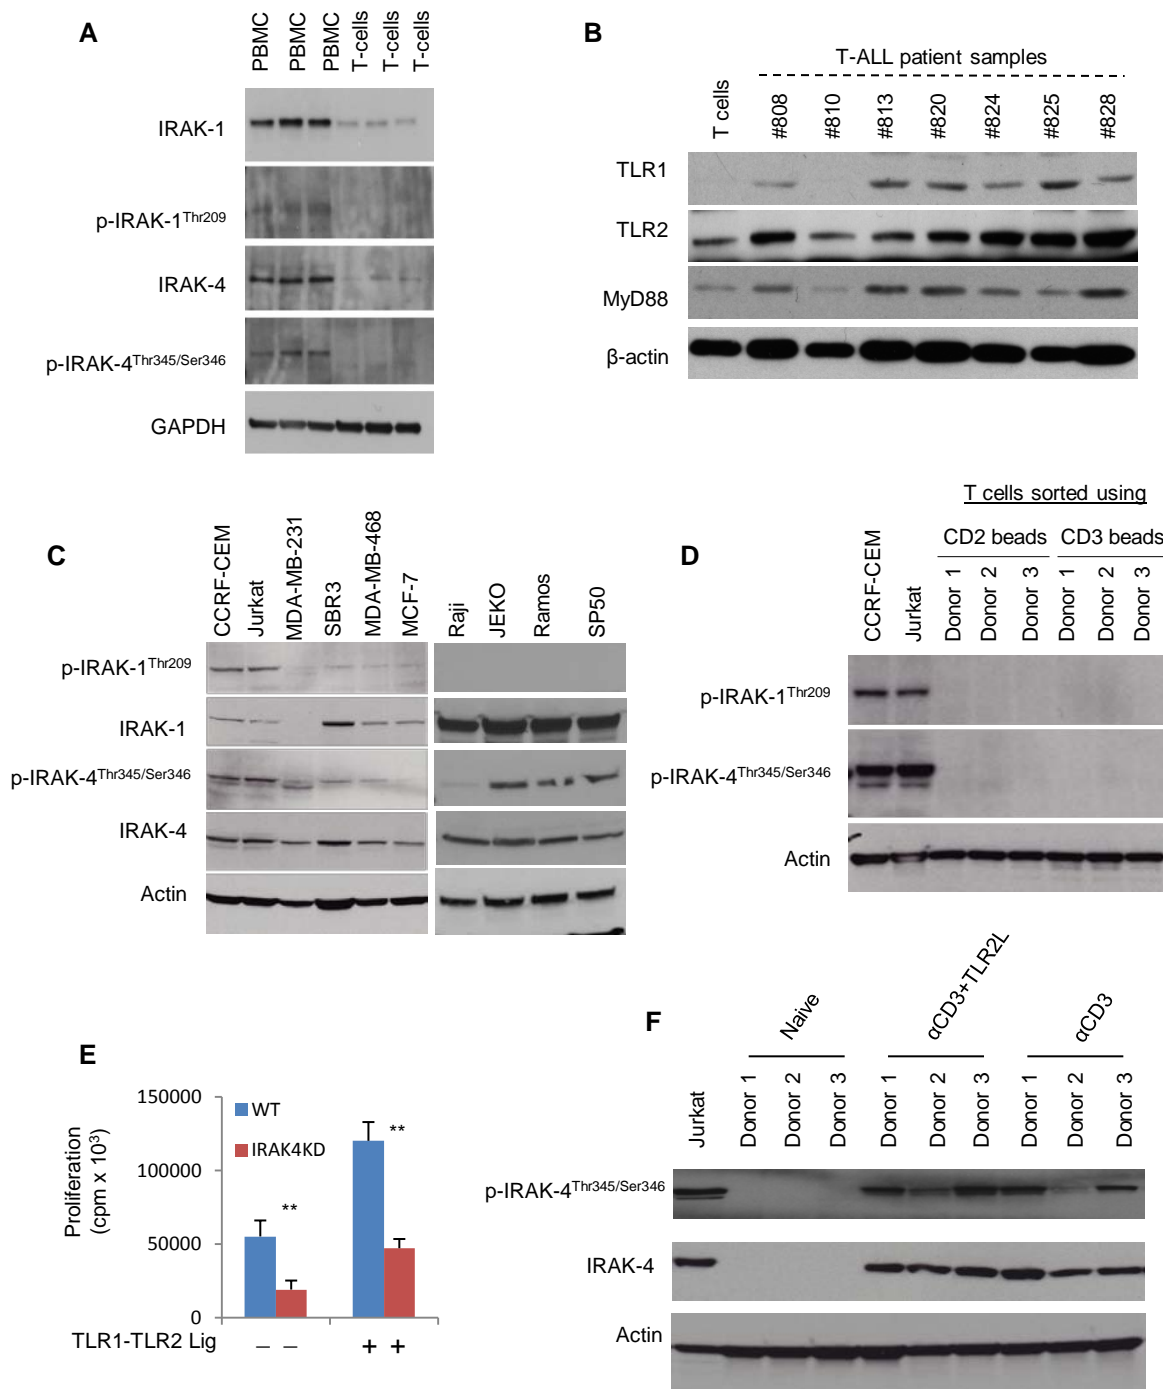

**Supplemental Figure 1.** (A) Western blot analysis of human PBMC and purified peripheral T-cells and (B) T-ALL patient samples examining the expression levels of the indicated proteins. (C) Western blot analysis of indicated protein levels in breast tumor cell lines (MB-231, SBR3, MB-468, MCF-7) Raji and Ramos (Burkitt's Lymphoma) JEKO (Mantle cell lymphoma), SP-50 (B cell lymphoma). (D) T cells were sorted using CD2 or CD3 beads and the levels of the indicated proteins were determined by western blot. CCRF-CEM and Jurkat cells served as controls both panels C and D. (E) Total T cells from IRAK-4 kinase dead (IRAK4KD) or wild type mice were purified by negative and activated using plate-bound CD3 antibody (0.5ug/ml) with or without TLR1-TLR2 ligand (1ug/ml). Proliferation was determined by <sup>3</sup>[H] thymidine incorporation measuring the average of triplicate readings. Analysis of data shown are representative of two independent experiments (mean±SD). \*\*p<0.01; T-test. (F) Western blot of total and phosphorylated IRAK-4 in naïve T cells and T cells activated with anti-CD3 with or without TLR1-TLR2 ligand (1ug/ml).

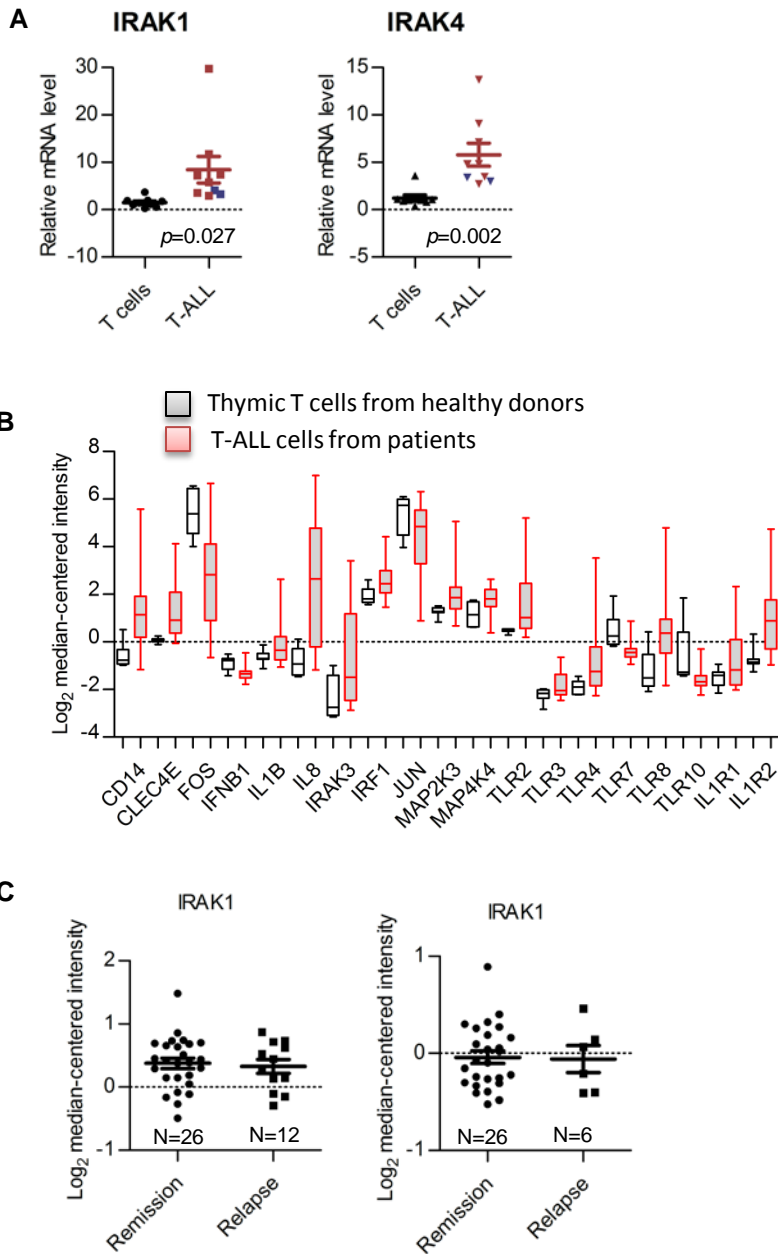

**Supplemental Figure 2.** (A) RT-PCR analysis of IRAK1 and IRAK4 levels in sorted CD3<sup>+</sup> T cells from healthy donor blood (n=7) and T-ALL samples from patient peripheral blood (red; n=6) or patient bone marrow (blue; n=2). Each symbol represents one donor. (B) Expression levels of IRAK signaling-related genes in T-ALL cells and thymic T cell controls. Analyses were conducted using the online available microarray data set (GSE46170). T-test,  $P < 0.05$ . Line, bar, and whiskers represent median, quartiles, and min-max values, respectively. (C) *IRAK1* transcript levels were not associated with chemoresistance. Microarray analysis of *IRAK1* mRNA levels between patients with remission and relapse from two independent data sets (left, Yeoh, et al. 2002 (<http://www.stjudereseearch.org/site/data/ALL1>)); right, Chiaretti, et al. 2004 (<http://master.bioconductor.org/packages/2.13/data/experiment/html/ALL.html>)).

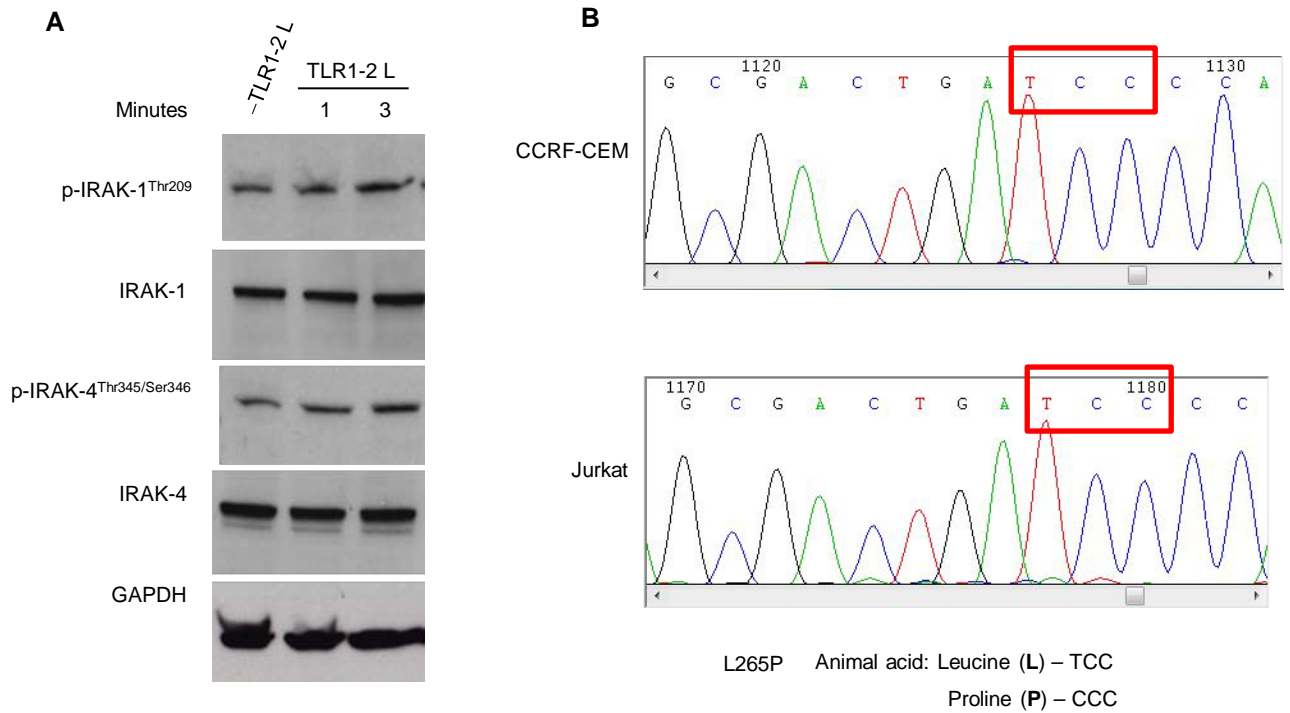

**Supplemental Figure 3.** (A) Western blot analysis of the indicated proteins from untreated CCRF-CEM cells or cells treated with TLR1-2 ligand (1.5  $\mu$ g/ml) for the indicated time points. (B) Gene sequencing of MyD88 in CCRF-CEM and Jurkat cells. Three independent sequences were conducted in reverse and forward orientation. Partial electropherograms focusing on the region of interest in the MyD88 gene are shown.

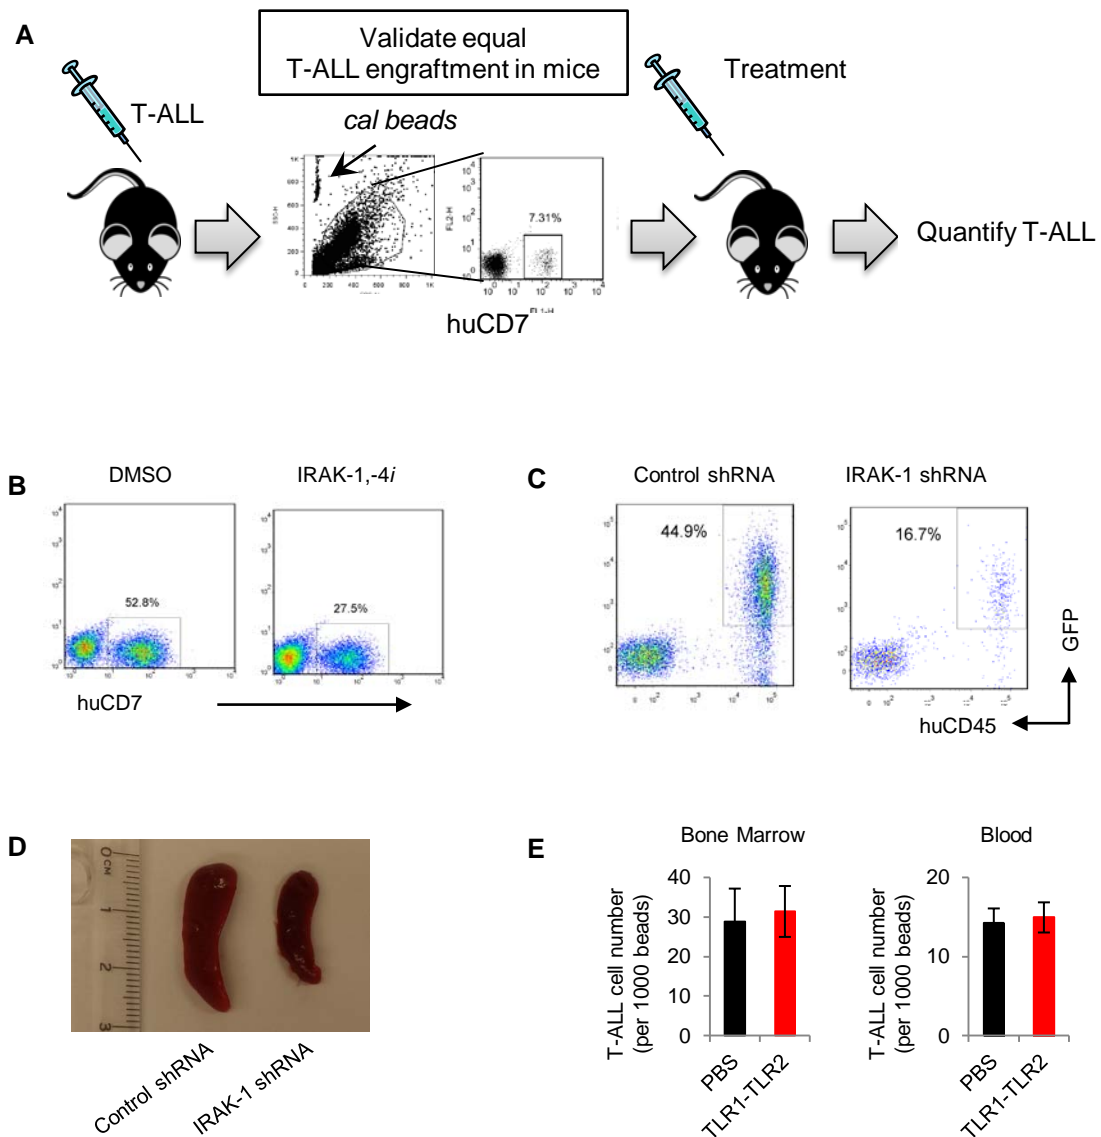

**Supplemental Figure 4.** (A) A schematic representation of the protocol used to normalize the T-ALL cell count between mice. T-ALL cell count between mice were normalized by adding 10 $\mu$ l of calibration beads to 50 $\mu$ l of blood (or bone marrow) and setting the instrument gates to count a constant number of beads. (B) CCRF-CEM cells ( $2 \times 10^6$  cells) were injected intravenously into NSG mice ( $n=5$ ), followed by intraperitoneal injection with IRAK-1,-4 inhibitor (10 mg/kg) or control vehicle (DMSO) on days 3, 6 and 9. Numbers of T-ALL cells (CD7<sup>+</sup>) in blood were determined on day 21 by flow cytometry. Representative dot plots were shown. (C)  $2 \times 10^6$  Jurkat IRAK-1 knockdown cells or control cells were injected i.v. into NSG mice. On day 21, numbers of T-ALL cells (GFP<sup>+</sup>CD45<sup>+</sup>) in blood were measured by flow cytometry. Representative dot plots were shown. (D) Representative spleens from NSG mice with i.v. injected control or IRAK-1 knockdown Jurkat cells. (E) Patient T-ALL cells (#824;  $5 \times 10^6$  cells) were injected intravenously into NSG mice, 7 days later, the mice were injected with TLR1-TLR2 ligand (Pam<sub>3</sub>CysK<sub>4</sub>, 2mg/kg) or control (PBS). On day 14, the number of T-ALL cells in bone marrow or blood were measured by staining with anti-human CD7 and CD5 antibodies and analyzed by flow cytometry.

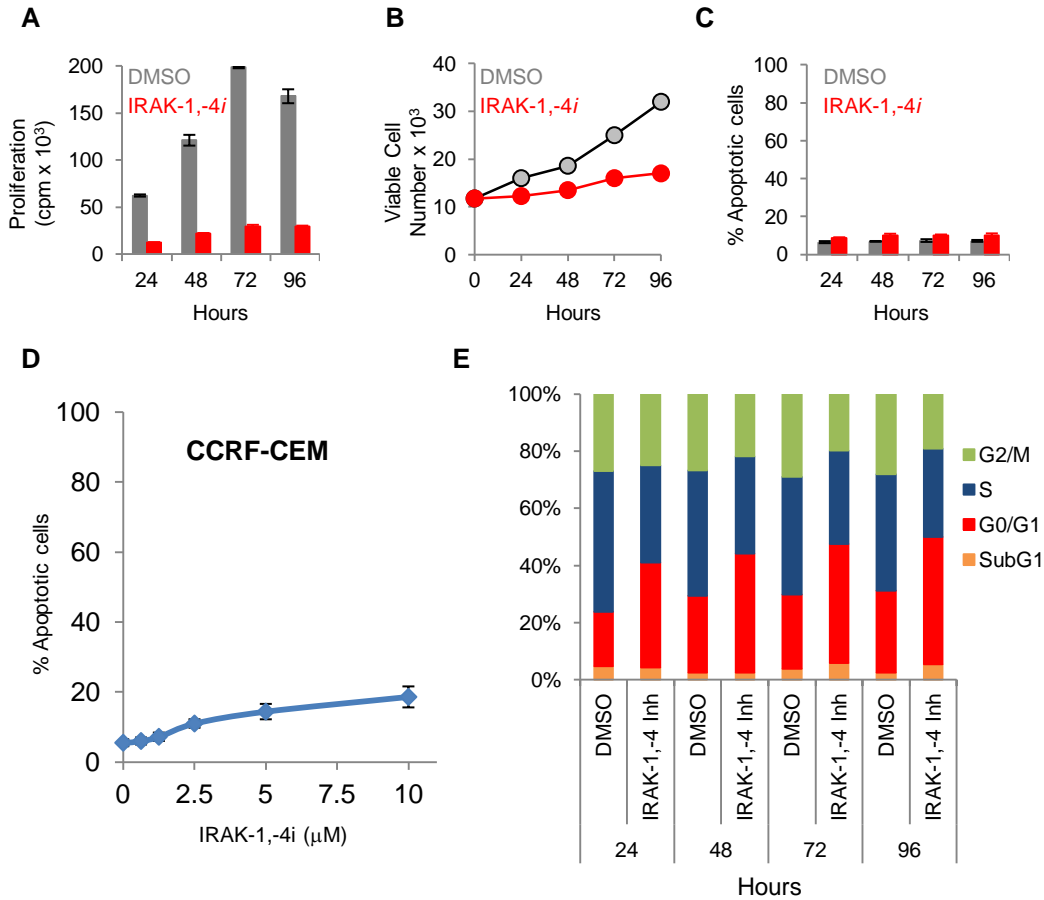

**Supplemental Figure 5.** CCRF-CEM cells were treated with IRAK-1,-4 inhibitor (2.5 μM) or DMSO for 24, 48, 72, and 96 hours and then, proliferation (A), cell number (B), apoptosis (C), and (E) cell cycle were determined by <sup>3</sup>H-thymidine incorporation, counting viable cells using trypan blue exclusion, by PI/Annexin-V staining, respectively. (D) CCRF-CEM cells were treated with the indicated concentrations of IRAK-1,-4 inhibitor for 48 hours followed by quantification of apoptosis assay by staining cells with Annexin-V and 7-AAD.

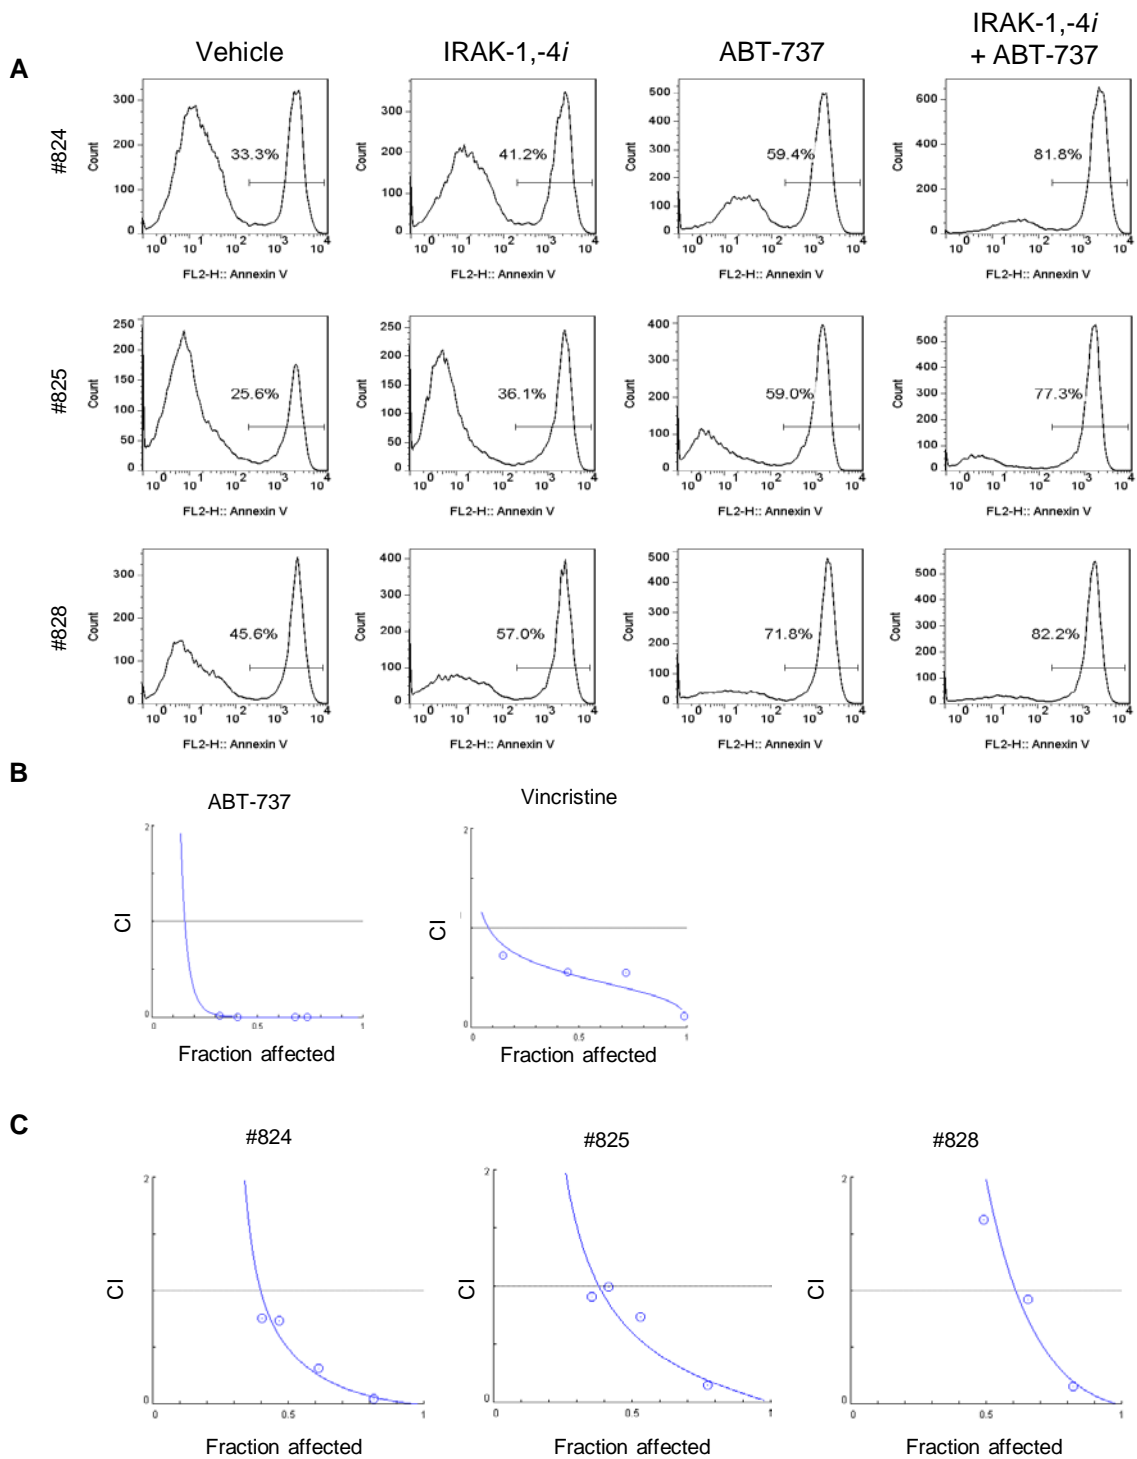

**Supplemental Figure 6. (A)** Representative histograms of patient T-ALL cells treated with IRAK-1,-4 inhibitor and ABT-737 alone or together and analyzed by flow cytometry. **(B and C)** CI, combination index, for combined ABT-737 or vincristine and IRAK-1,-4 inhibitor is shown in Figure B for Jurkat cells and for patient T-ALL in panel C and was determined using Compusyn software.

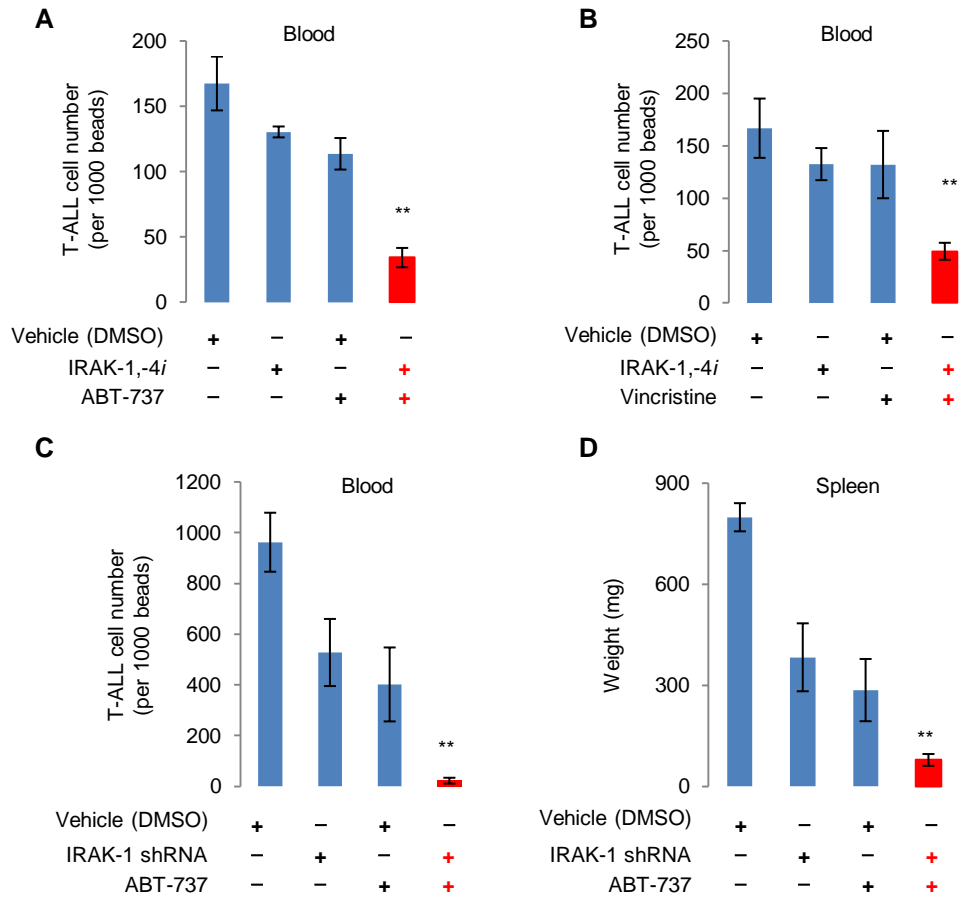

**Supplemental Figure 7. (A, B)** NSG mice (n=5/group) were injected i.v. with  $3 \times 10^6$  CCRF-CEM cells. On day 3, 6, 9, IRAK-1,-4 inhibitor (5mg/kg), ABT-737 (40mg/kg), or vincristine (0.5mg/kg) were injected i.p. into the mice. T-ALL cell numbers were measured by flow cytometry. \*\*  $P < 0.01$ , *T*-test. **(C, D)** NSG mice (n=5/group) were injected i.v. with  $3 \times 10^6$  Jurkat engineered to downregulate IRAK-1 using cells using shRNA lentiviral vectors (or control vectors). On day 3, 6, 9, ABT-737 was injected i.p. into the mice. T-ALL cell numbers were measured by flow cytometry on day 21. T-ALL cell numbers in blood are shown. **(D)** Average weight of spleens collected from the different treatment groups is shown. \*\*  $P < 0.01$ , *T*-test.

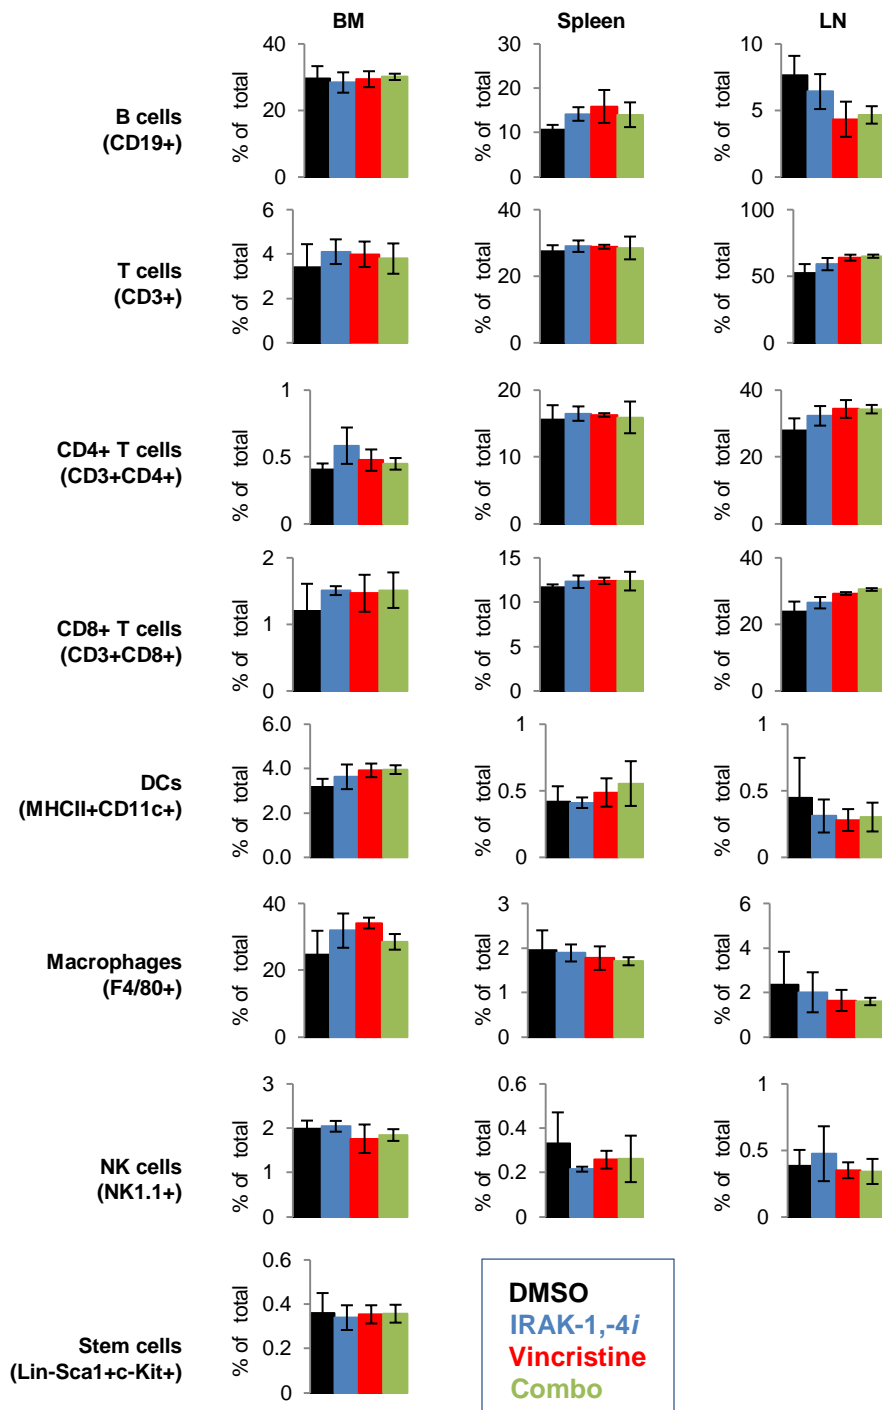

**Supplemental Figure 8.** C57BL/6 mice were injected i.p. with IRAK-1,-4 inhibitor, vincristine or both using the same concentrations as used in NSG mice (IRAK-1,-4 inhibitor (5mg/kg); Vincristine (0.5mg/kg)) on day 3, 6, 9. On day 21, the indicated immune cell populations in bone marrow (BM), spleen, and lymph node (LN) were analyzed by flow cytometry.



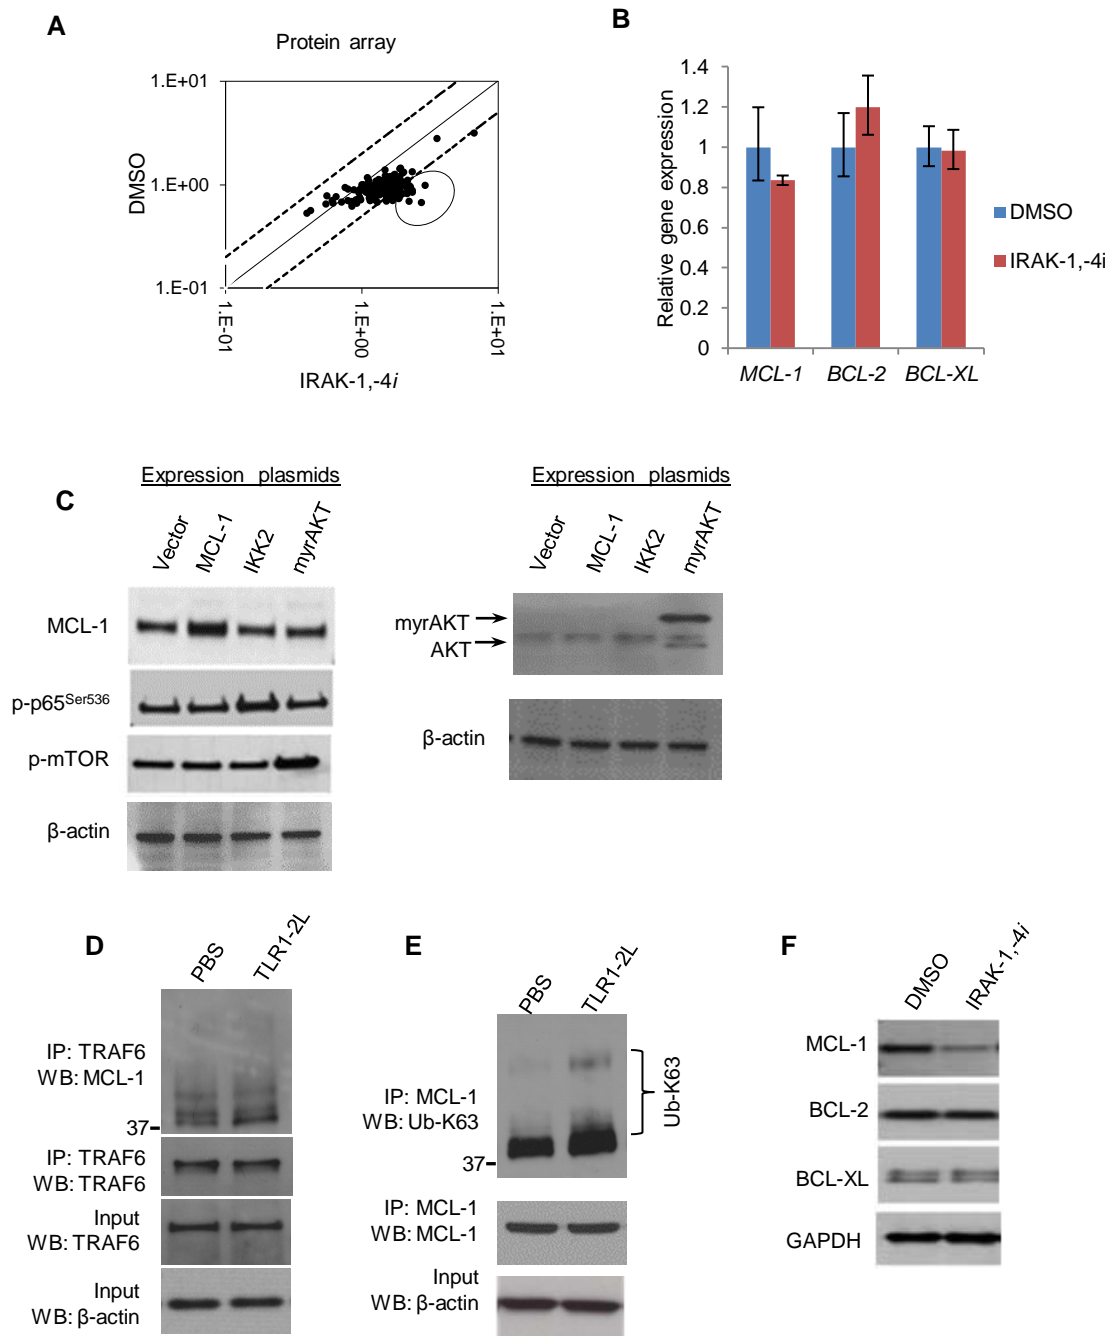

**Supplemental Figure 9.** (A) CCRF-CEM cells were treated with IRAK-1,-4 inhibitor (5  $\mu$ M) or DMSO for 48 hours. Cell lysates were analyzed using Fullmoon Apoptosis antibody array. (B) RT-PCR analysis of *MCL-1*, *BCL-2*, and *BCL-XL* expression levels from CCRF-CEM cells treated with IRAK-1,-4 inhibitor (5 $\mu$ M) or DMSO. (C) CCRF-CEM cells transfected with control plasmid (p-Vector) and plasmids for *MCL-1* (p-MCL-1), mutated *IKK2* (p-IKK2), and *AKT* (p-myrAKT) and the indicated protein levels were examined by western blot analyses. (D) and (E) Co-immunoprecipitation assay and western blot analysis. CCRF-CEM cells were treated with TLR1-TLR2 ligand (2.5  $\mu$ g/ml) or PBS, and lysates were subjected to a IP using anti-TRAF6 antibody (D) or anti-MCL-1 antibody (E) and immunoblotted (WB) with anti-MCL-1 and anti-TRAF6 (D) or anti-Ub-K63 and anti-MCL-1 (E) antibodies. Direct WB analysis was used to monitor protein expression levels.

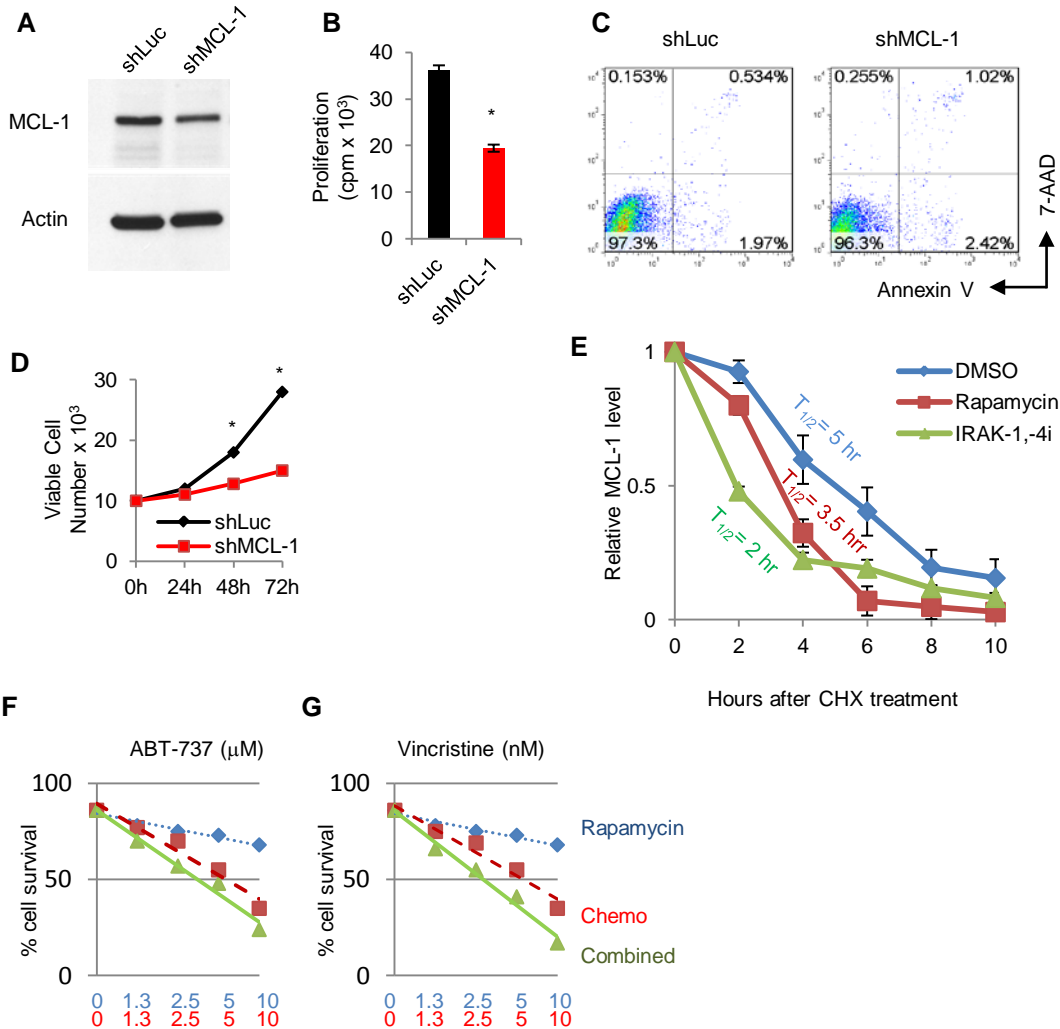

**Supplemental Figure 10.** CCRF-CEM cells were transiently transfected with plasmids containing the MCL-1 shRNA (shMCL-1-GFP) or control shRNA (shLuc-GFP). GFP positive cells were sorted by flow cytometry. **(A)** Western blot analysis of MCL-1 levels in CCRF-CEM cells transfected with MCL-1 shRNA (shMCL-1) or control shRNA (shLuc). Proliferation **(B)**, apoptosis **(C)** and cell number **(D)** were determined by <sup>3</sup>H-thymidine incorporation, 7AAD/Annexin-V staining, and cell enumeration using trypan blue exclusion, respectively. **(E)** CCRF-CEM cells were treated with Rapamycin (5nM), IRAK-1,-4 inhibitor (5 $\mu$ M) or DMSO for 6 hours. The cells were then treated with cycloheximide (CHX) for 0, 2, 4, 6, 8, 10 hours. The total cell lysates were analyzed by western blot for MCL-1 expression. Densitometric values ( $\pm$ SD) for MCL-1 protein relative to 0 hour MCL-1 of each treatment group are shown taken from the average of three independent experiments. **(F and G)** CCRF-CEM cells were cultured with Rapamycin or chemotherapy alone or together at the indicated drug concentrations. After 48 hours, apoptosis was examined by flow cytometry (AnnexinV/7AAD) to determine cell death. Data is represented of two experiments.

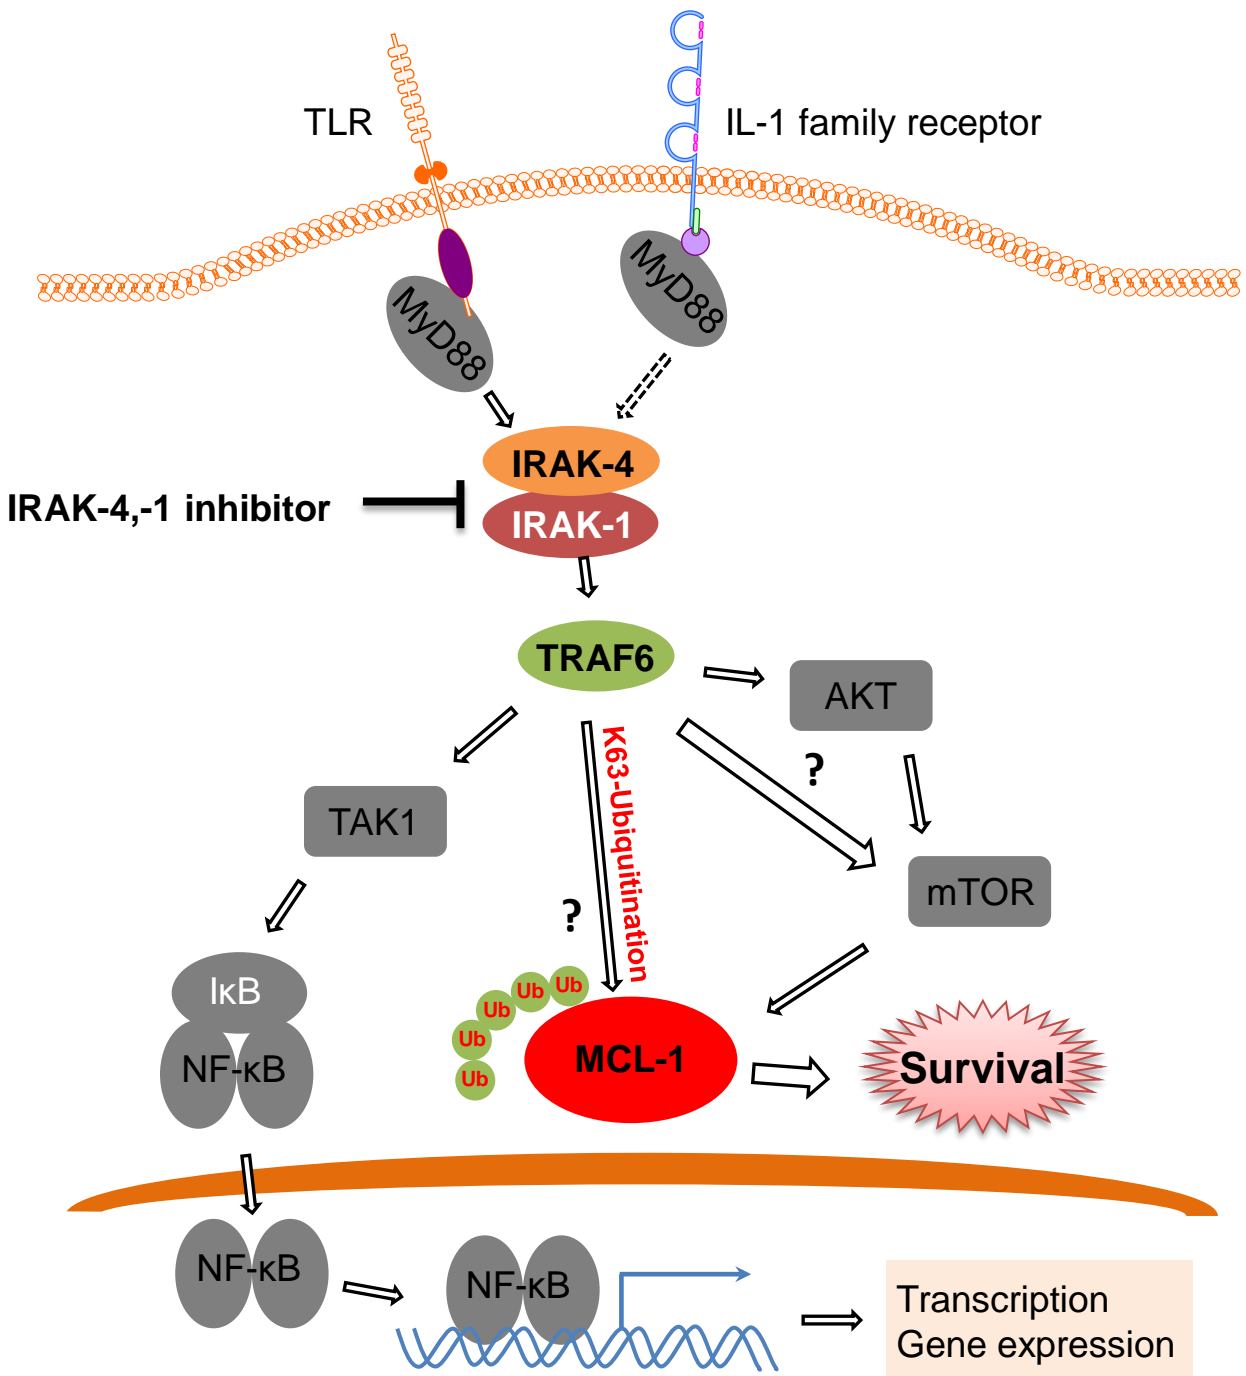

**Supplemental Figure 11.** Model describing how IRAK signaling in T cell acute lymphoblastic leukemia contributes to cell survival and chemotherapy sensitization. In T-ALL IRAK-4,-1 is activated in the absence of exogenous TLR ligands. However, further activation of IRAK-4 and IRAK-1 signaling can occur via the engagement of TLRs or IL-1R. It possible that IRAK-4,-1 activation might also arise activating mutations in MyD88. IRAK-4 activates IRAK-1 which activates TRAF6 and leads to the activation of NF-κB via TAK1. IRAK signaling also impact the levels of p-AKT and p-mTOR. Whether reduced levels of p-AKT that occur in response to IRAK-4,-1 inhibition are directly responsible for the reduced p-mTOR levels after IRAK inhibition have yet to be determined. TRAF6 associates with MCL-1 and increases K63-linked ubiquitination, resulting in increased protein stability. TLR, Toll like receptor; MyD88, myeloid differentiation primary-response 88; IRAK, interlukin-1 (IL-1)-receptor-associated-kinase; TRAF6, tumor-necrosis-factor-associated factor 6; TAK1, transforming-growth-factor-β-activated kinase 1; IκB, inhibitor of nuclear factor-κB; NF-κB, nuclear factor-κB; MCL-1, myeloid cell leukemia sequence 1; AKT, also known as protein kinase B; mTOR, mammalian target of rapamycin;.

**Supplemental Table 1. Proliferative effects of TLR agonists on T-cell neoplasms.**

| Proliferative effects of TLR ligands on T-cell subsets |          |        |        |        |        |       |        |       |       |                                             |    |         |      |       |                 |           |
|--------------------------------------------------------|----------|--------|--------|--------|--------|-------|--------|-------|-------|---------------------------------------------|----|---------|------|-------|-----------------|-----------|
| Acute Lymphoblastic Leukemia                           |          |        |        |        |        |       |        |       |       | Cutaneous T-cell Lymphoma / T-cell Leukemia |    |         |      |       | Primary T-cells |           |
|                                                        | CCRF-CEM | CEM-C1 | CEM-C2 | CEM-C7 | Jurkat | Loucy | Molt-4 | HSB-2 | SupT1 | Hut-78                                      | HH | Hut 102 | MO   | H9    | Non-Act         | Activated |
| TLR1/2 (Pam3Cysk4)                                     | +        | +      | +      | +      | +      | +     | o      | -     | o     | o                                           | o  | o       | o    | o     | o               | +         |
|                                                        | (1.2)    | (2.5)  | (2.5)  | (2.5)  | (10)   | (2.5) |        | (5)   |       |                                             |    |         |      |       |                 | (10)      |
| TLR3 (pl:C)                                            | o        | o      | o      | -      | o      | o     | o      | -     | -     | o                                           | o  | -       | o    | -     | o               | o         |
|                                                        |          |        |        | (10)   |        |       |        | (0.6) | (2.5) |                                             |    | (10)    |      | (1.2) |                 |           |
| TLR4 (LPS)                                             | o        | o      | -      |        | o      | o     | o      | -     | o     | o                                           | o  | -       | -    | -     | o               | o         |
|                                                        |          |        | (5.0)  |        |        |       |        | (0.3) |       |                                             |    | (10)    | (5)  | (5)   |                 |           |
| TLR5 (Flagellin)                                       | o        | o      | o      | -      | o      | o     | o      | -     | o     | o                                           | o  | o       | o    | -     | o               | +         |
|                                                        |          |        |        | (2.5)  |        |       |        | (10)  |       |                                             |    |         |      | (10)  |                 | (10)      |
| TLR2/6 (HKML)                                          | o        | o      | o      | o      | o      | o     | -      | -     | -     | o                                           | o  | o       | o    | -     | o               | o         |
|                                                        |          |        |        |        |        |       | (5.0)  | (5)   | (10)  |                                             |    |         |      | (2.5) |                 |           |
| TLR7 (Imiquimod)                                       | o        | o      | o      | o      | -      | o     | o      | -     | -     | o                                           | o  | o       | o    | o     | o               | -         |
|                                                        |          |        |        |        | (10)   |       |        | (1.2) | (0.6) |                                             |    |         |      |       |                 | (5)       |
| TLR8 (ssRNA)                                           | o        | o      | o      | o      | o      | +     | o      | -     | -     | o                                           | o  | -       | -    | -     | o               | -         |
|                                                        |          |        |        |        |        | (5)   |        | (0.1) | (5)   |                                             |    | (5)     | (10) | (1.2) |                 | (5)       |
| TLR9 (CpG-ODN)                                         | o        | o      | o      | o      | o      | o     | o      | -     | -     | o                                           | o  | -       | -    | -     | o               | o         |
|                                                        |          |        |        |        |        |       |        | (0.6) | (1.2) |                                             |    | (5)     | (10) | (0.6) |                 |           |

The various malignant cell lines or healthy T cells were cultured in the presence of varying concentrations (10–0.1 µg/ml) of the different TLR ligands shown for 72 hrs. Proliferation was determined by measuring <sup>3</sup>[H]-thymidine uptake. Changes in proliferation greater than 20% are represented by symbol “+” (increased proliferation), “-” (reduced proliferation), or “o” for no change. The values in parentheses indicate concentrations at which the noted differences were observed.

**Supplemental Table 2.** Association between mutations, translocations and response to IRAK inhibitor

| Cell Line | Tumor Type | Cytogenetics        | Mutation       | Note                                    | Response to IRAK-1,-4i |
|-----------|------------|---------------------|----------------|-----------------------------------------|------------------------|
| CCRF-CEM  | T-ALL      | t(5;14)(q35.1;q32)  | Notch1, p53    | Gamma-secretase-resistant               | Yes                    |
| CEM/C1    | T-ALL      | t(5;14)(q35.1;q32)  | TLX3           | Camptothecin (CPT) resistant derivative | Yes                    |
| CEM/C2    | T-ALL      | t(5;14)(q35.1;q32)  | TLX3           | Camptothecin (CPT) resistant derivative | Yes                    |
| CEM/C7    | T-ALL      | t(5;14)(q35.1;q32)  | TLX3           | Glucocorticoid-sensitive derivative     | Yes                    |
| Jurkat    | T-ALL      | 46,XY,-2,-18,del    | Notch1, p53    | Gamma-secretase-resistant               | Yes                    |
| MOLT4     | T-ALL      | hypertetraploid     | Notch1         | Gamma-secretase-resistant               | No                     |
| Mo        | T leukemia | no information      |                |                                         | Yes                    |
| HuT78     | T lymphoma | t(2;8)(q34;q24)     | MYC, TCL4, p53 |                                         | Yes                    |
| H9        | T lymphoma | near triploid       |                |                                         | Yes                    |
| HH        | T leukemia | no information      |                |                                         | Yes                    |
| Patient # |            |                     |                |                                         |                        |
| #808      | T-ALL      | normal cytogenetics |                |                                         | Not tested             |
| #810      | T-ALL      | t(11;14)(p13;q11.2) | LMO1           |                                         | Not tested             |
| #813      | T-ALL      | normal cytogenetics |                |                                         | Yes                    |
| #820      | T-ALL      | t(11;14)(p13;q11.2) | LMO1           |                                         | Yes                    |
| #824      | T-ALL      | t(11;19)(q23;p13.3) | LMO2           |                                         | No                     |
| #825      | T-ALL      | normal cytogenetics |                |                                         | Yes                    |
| #828      | T-ALL      | t(7;9)(q34;q34.3)   | Notch1         |                                         | Yes                    |

**Supplemental Table 3.** Real-Time PCR primer sequences

| Primer Name            | Sequences (5' - 3')      |
|------------------------|--------------------------|
| <i>MCL-1 forward</i>   | CCAAGAAAGCTGCATCGAACCAT  |
| <i>MCL-1 reverse</i>   | CAGCACATTCCTGATGCCACCT   |
| <i>BCL-2 forward</i>   | ATCGCCCTGTGGATGACTGAGT   |
| <i>BCL-2 reverse</i>   | GCCAGGAGAAATCAAACAGAGGC  |
| <i>BCL-XL forward</i>  | GCCACTTACCTGAATGACCACC   |
| <i>BCL-XL reverse</i>  | AACCAGCGGTTGAAGCGTTCCT   |
| <i>β-actin forward</i> | CACCATTGGCAATGAGCGGTTC   |
| <i>β-actin reverse</i> | AGGTCTTTGCGGATGTCCACGT   |
| <i>IRAK1 forward</i>   | TCAGAACGGCTTCTACTGCCTG   |
| <i>IRAK1 reverse</i>   | TACCCAGAAGGATGTCCAGTCG   |
| <i>IRAK4 forward</i>   | ATGCCACCTGACTCCTCAAGTC   |
| <i>IRAK4 reverse</i>   | CCACCAACAGAAATGGGTCGTTTC |
| <i>GAPDH forward</i>   | GTCTCCTCTGACTTCAACAGCG   |
| <i>GAPDH reverse</i>   | ACCACCCTGTTGCTGTAGCAA    |
